# Supplementary material for: Associations between Neck Circumference, Mid-Upper Arm Circumference, Wrist Circumference, and High Blood Pressure among Lithuanian Children and Adolescents: A Cross-Sectional Study
Source: MDPI journal article supplement (doi:10.3390/nu16050677), 2024-02-28
Supplement: s1 [file s1]

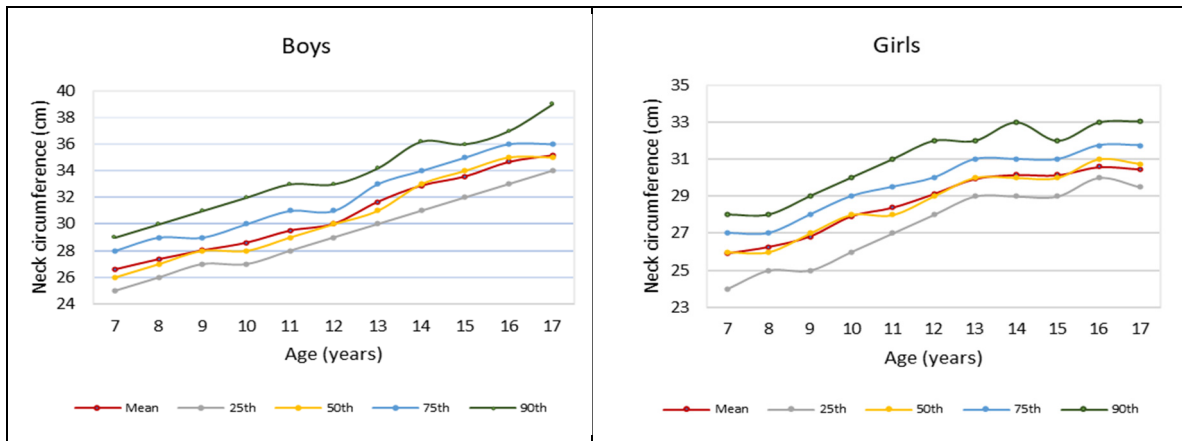

**Figure S1.** Age- and sex-specific percentile values of the NC in study participants aged 7–17 years.

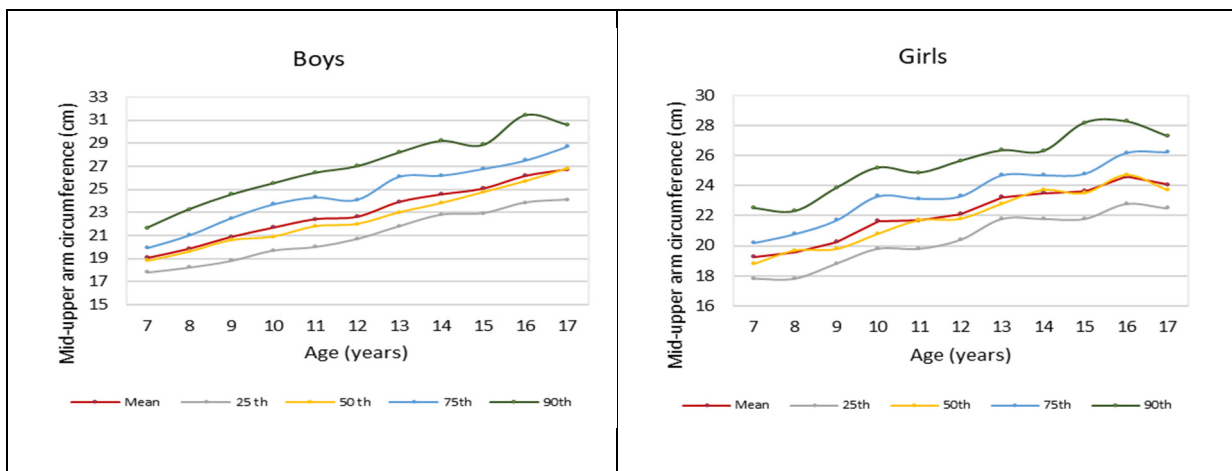

**Figure S2.** Age- and sex-specific percentile values of the MUAC in study participants aged 7–17 years.

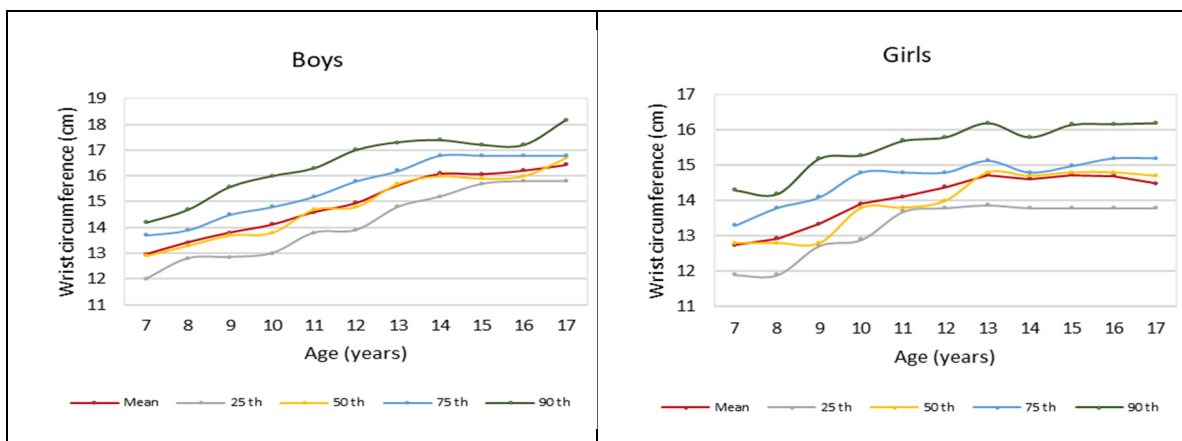

**Figure S3.** Age- and sex-specific percentile values of the WrC in study participants aged 7–17 years.

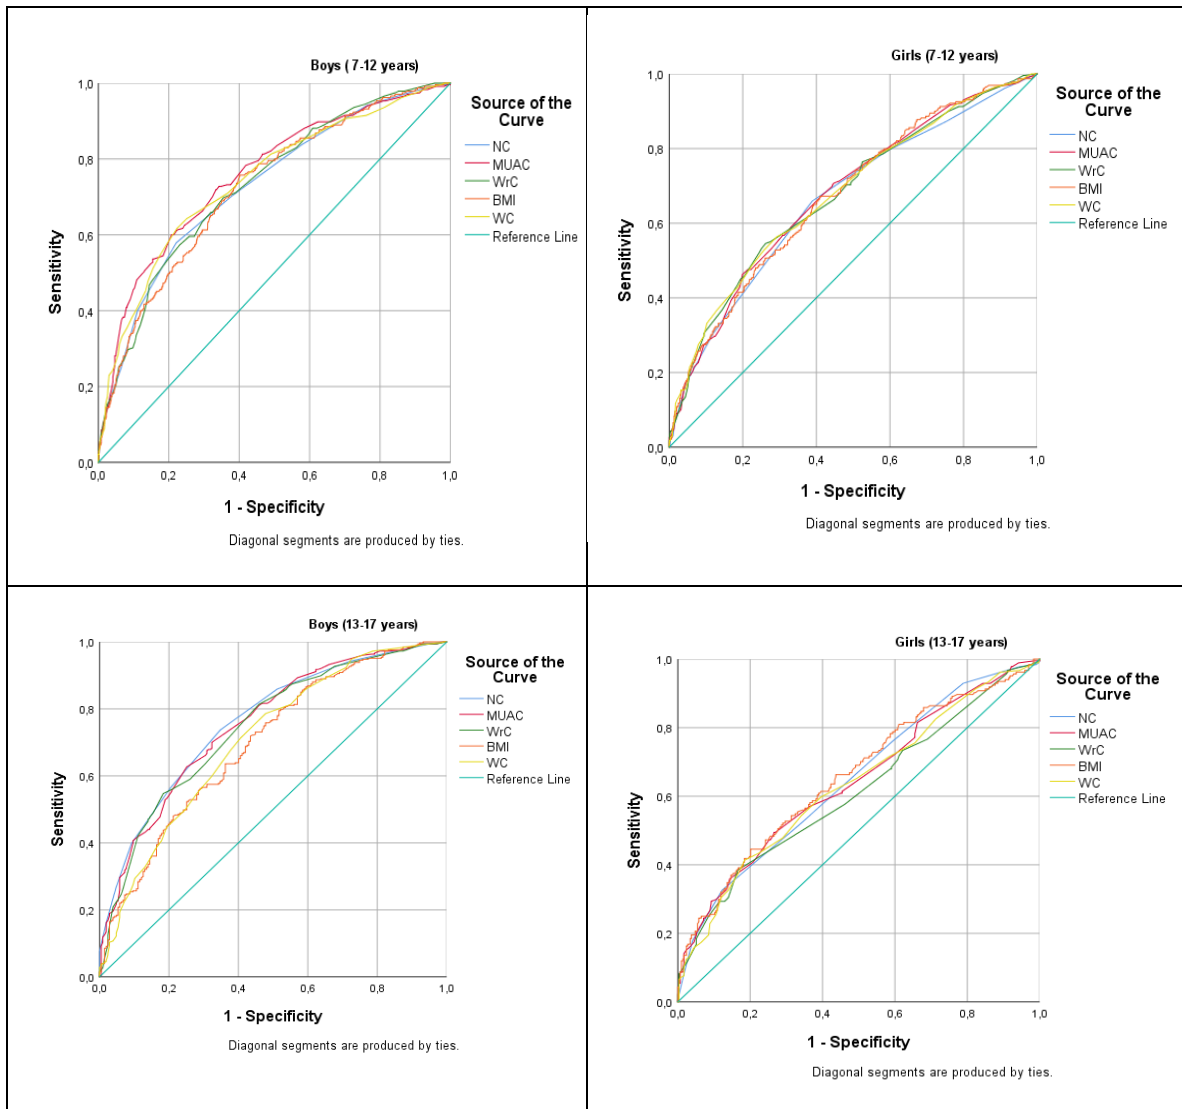

**Figure S4.** Area under ROC curves of anthropometric indices to predict HBP.
